# Supplementary material
Source: publisher figshare collection journal article supplement (https://sage.figshare.com/ndownloader/files/12371030)
Supplement: Supplementary file 1 [file 12371030]

**Supplementary Table 1 International criteria for BD: point score system**

| Sign/system                 | Points |
|-----------------------------|--------|
| Ocular lesions              | 2      |
| Genital aphthosis           | 2      |
| Oral aphthosis              | 2      |
| Skin lesions                | 1      |
| Neurological manifestations | 1      |
| Vascular manifestations     | 1      |

**Score  $\geq 4$  indicates Behçet's syndrome**
